# Supplementary material for: Fibroblast growth factor-2-mediated protection of cardiomyocytes from the toxic effects of doxorubicin requires the mTOR/Nrf-2/HO-1 pathway
Source: PubMed Central journal article supplement (PMC5675643; doi:10.18632/oncotarget.20558), 2017-08-24
Supplement: oncotarget-08-87415-s001.pdf [file oncotarget-08-87415-s001.pdf]

## Fibroblast growth factor-2-mediated protection of cardiomyocytes from the toxic effects of doxorubicin requires the mTOR/Nrf-2/HO-1 pathway

### SUPPLEMENTARY MATERIALS

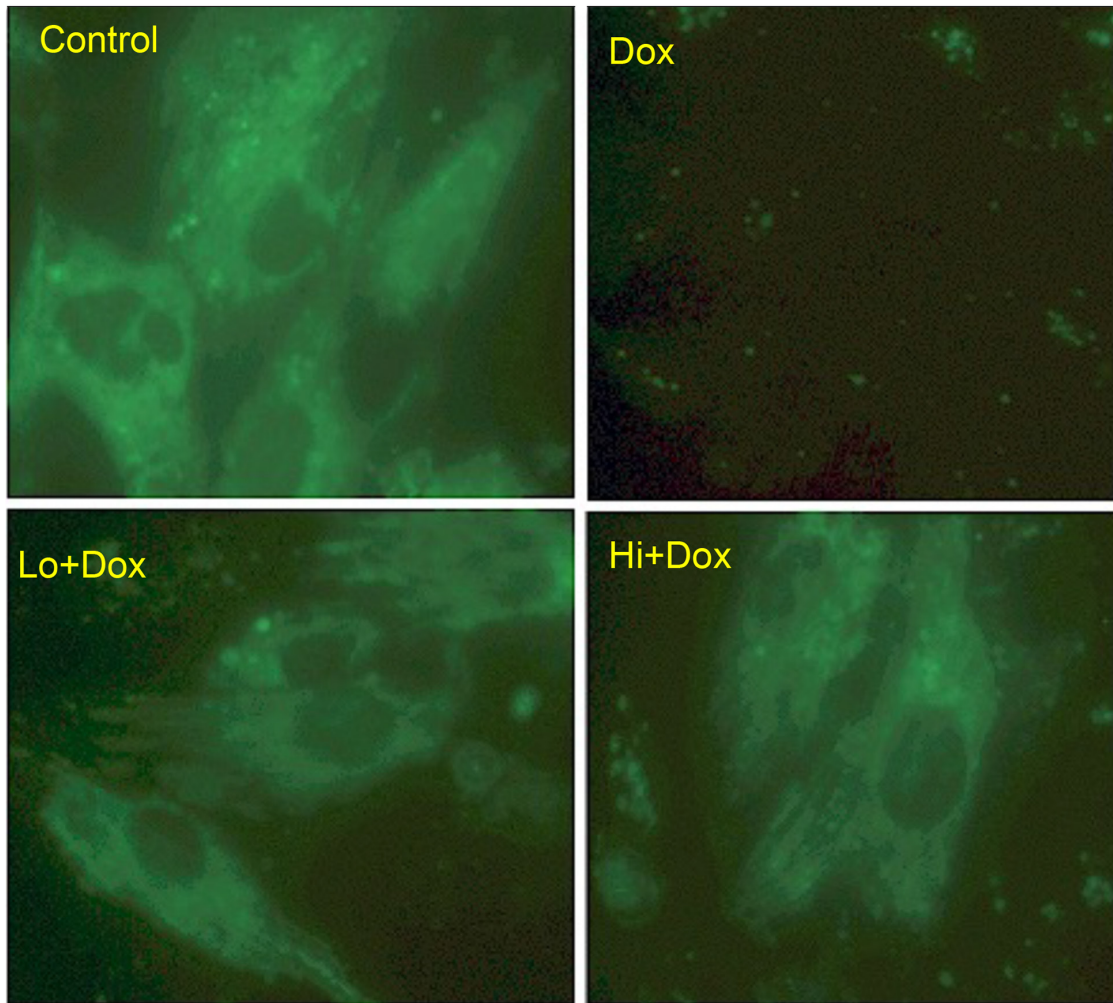

**Supplementary Figure 1: FGF-2 isoforms prevent the Dox-induced mitochondrial permeability transition pore, mPTP.** Representative images of cardiomyocytes, in the absence or presence of Dox and FGF-2 isoforms, as indicated, stained with Calcein-Cobalt, where healthy mitochondria display green color. Cardiomyocytes were exposed to 0.5 $\mu$ M of Dox for 24 hours in the presence and absence of Lo- or Hi-FGF-2 pre-incubation.

A

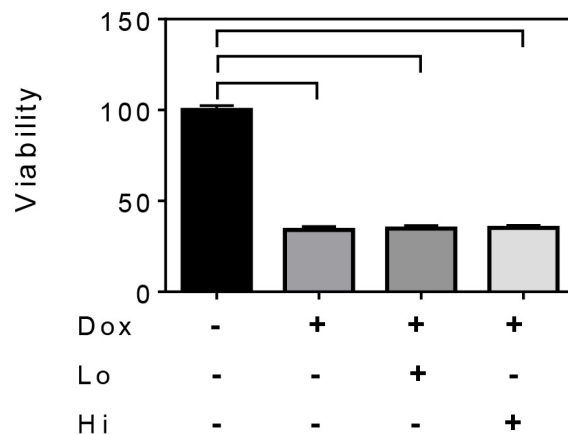

B

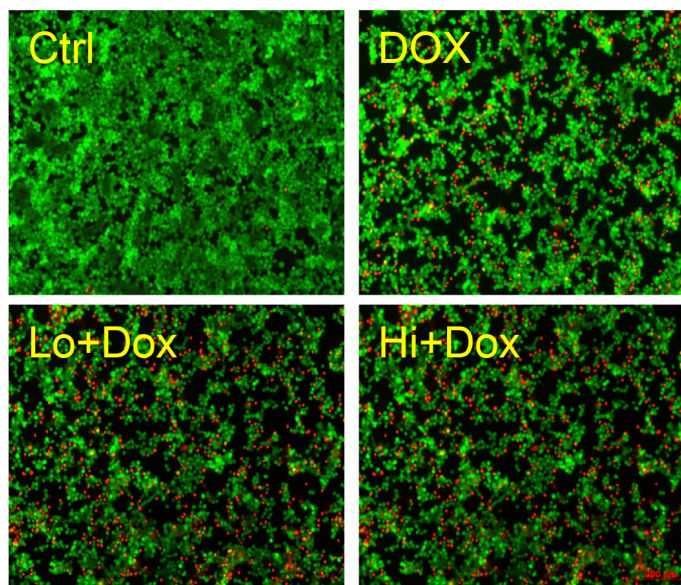

**Supplementary Figure 2: FGF-2 isoforms do not protect MCF-7 cell from Dox-induced death.** (A) Viability of MCF-7 cells, measured by the Calcein-AM fluorescence intensity assay. Cells were insulted with Dox 0.5  $\mu$ M for 24 hours in the presence and absence of FGF-2 isoform pre-incubation for 30 min. (B). Representative images of Calcein-AM (green, live cells)/Ethidium homodimer (red, dead cells) assay are shown in the lower section. Data is plotted as mean  $\pm$  SEM and statistical differences are shown by brackets where significant  $P < 0.05$ . The scale bar shown in the figure corresponds to 200  $\mu$ m.

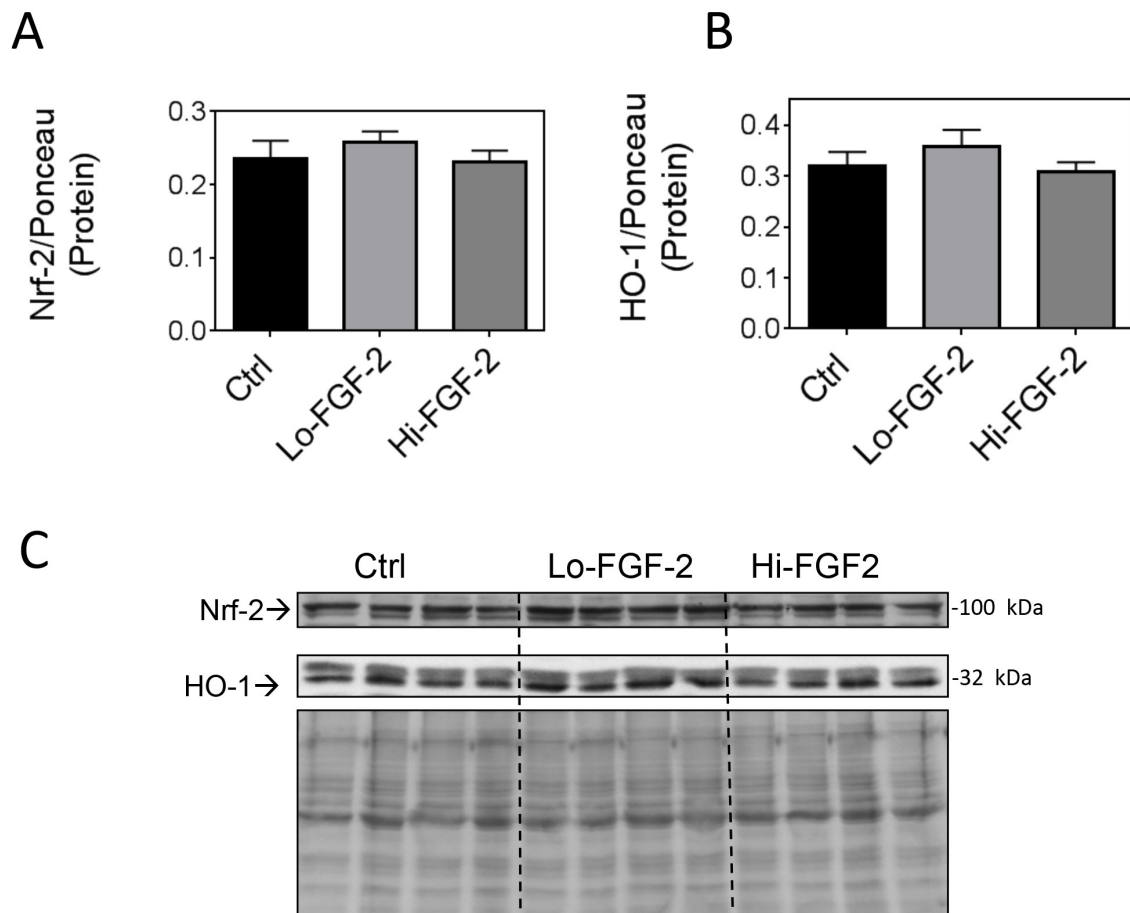

**Supplementary Figure 3: FGF-2 isoforms do not change Nrf-2 and HO-1 protein levels in the absence of Doxorubicin.** (A) and (B) show, respectively, relative protein levels of Nrf-2 and HO-1 in cardiomyocytes stimulated with Lo- or Hi-FGF-2 (10 ng/ml) for 24 hours. The corresponding western blots are shown in (C). Ponceau S staining of the total transferred proteins was used for normalization. There are no significant differences between the groups.

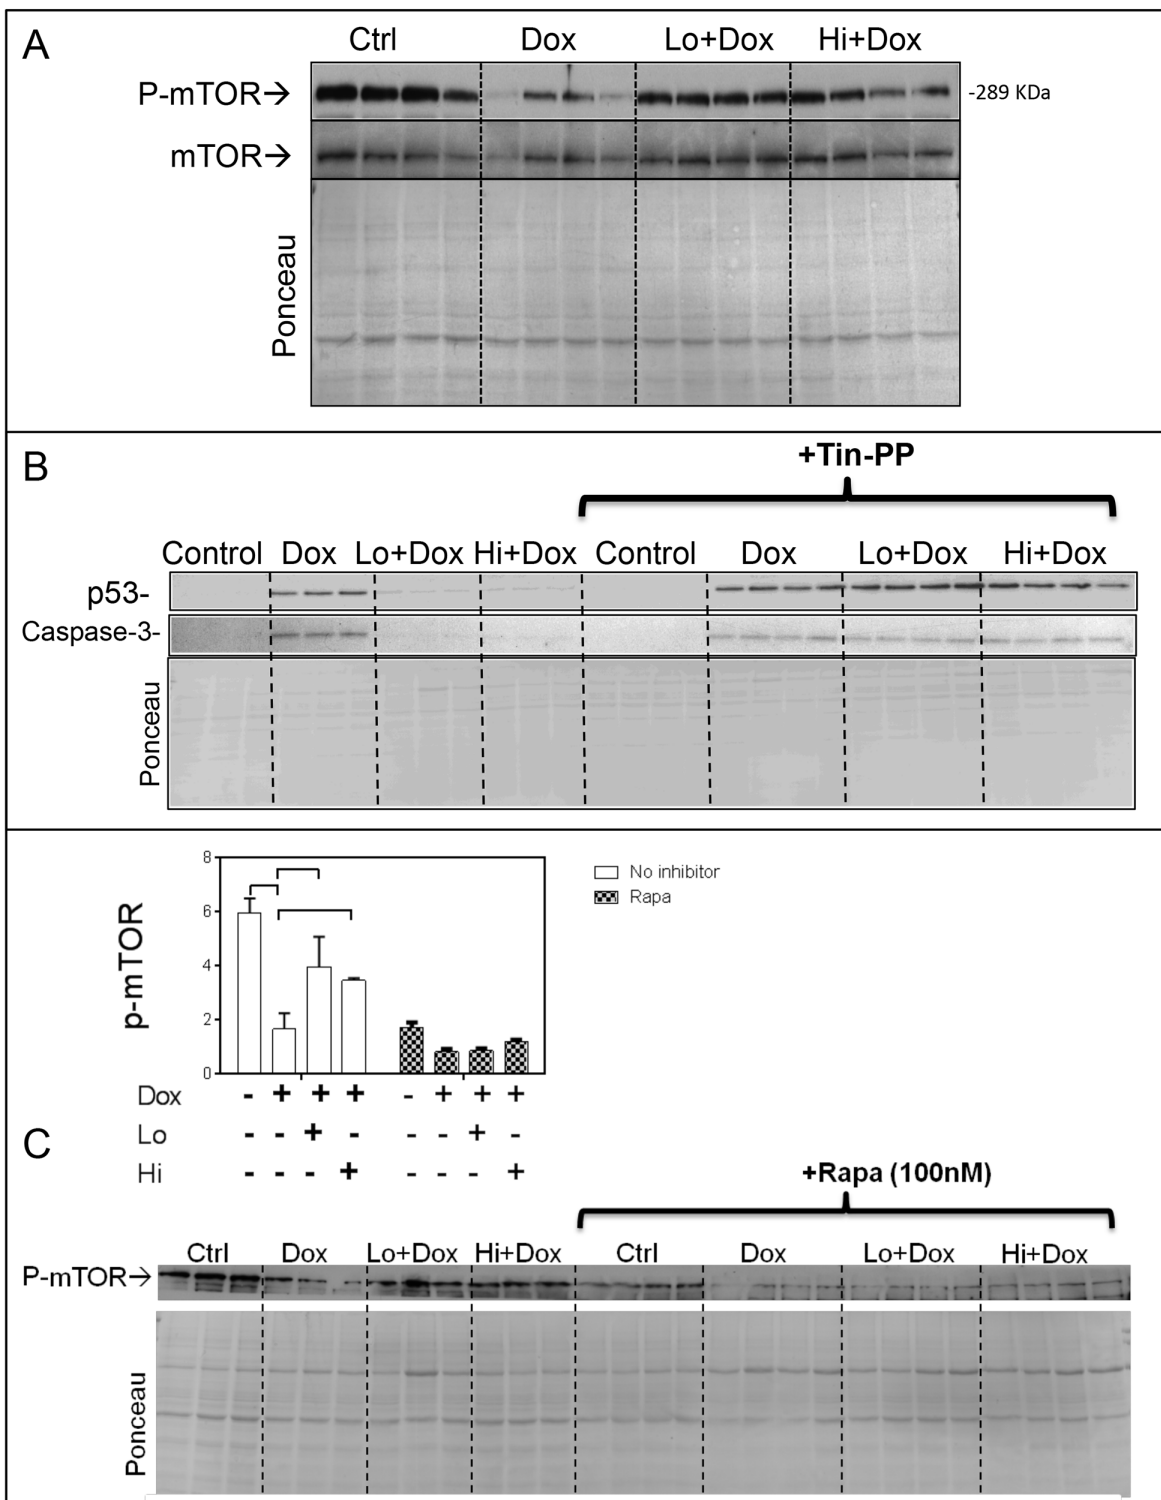

**Supplementary Figure 4:** Western blots of cardiomyocytes insulted with Dox for 24 hours, with and without Lo- or Hi-FGF-2 (10ng/ml) 30-min pre-incubation, in the presence and absence of Rapamycin or Tin-PP. **Panel (A)** and **(B)** show the corresponding western blots for Figures 5.A and 6.C and D, respectively. **Panel (C)** shows relative levels of p-mTOR to total loaded protein (Ponceau S) in cardiomyocytes.

A

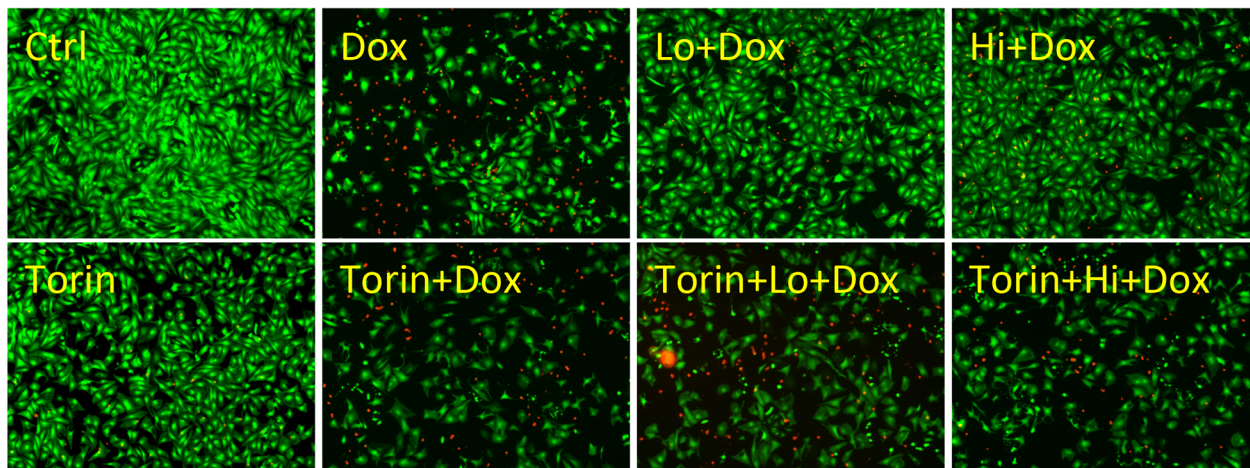

B

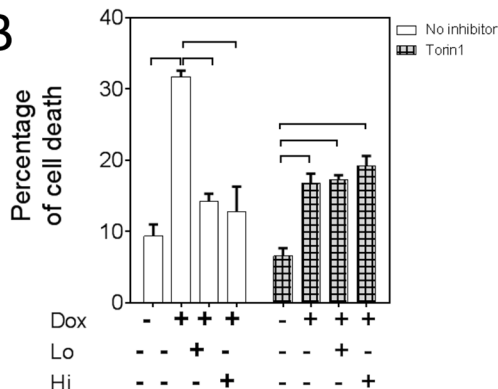

C

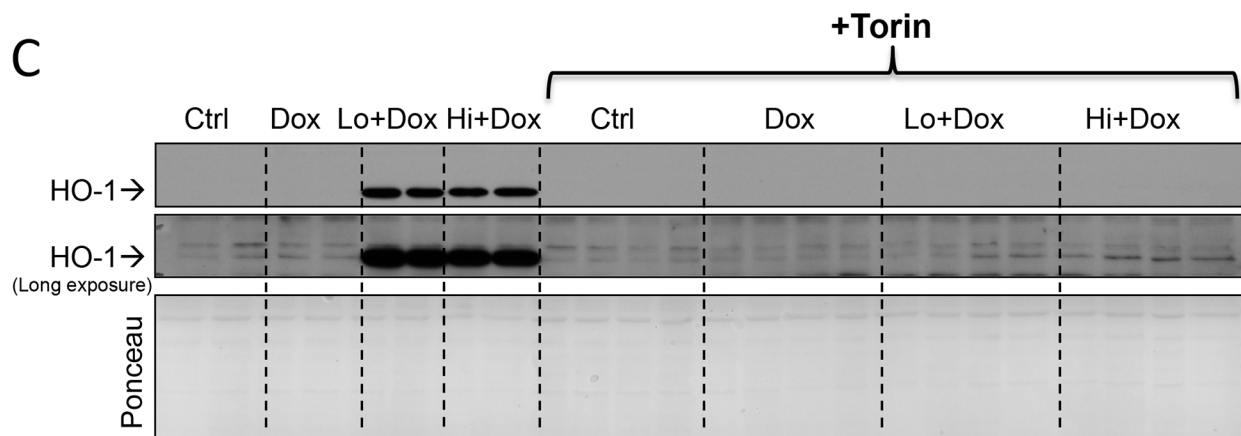

**Supplementary Figure 5: Torin-1 prevents cardioprotection and upregulation of HO-1 by FGF-2 isoforms.** (A) Representative fluorescence images from cardiomyocytes exposed or not to Dox, FGF-2 isoforms, and Torin-1, as indicated, stained with the Live/Dead assay. (B) Corresponding quantitative data (percent cell death on attached cells), n=4. (C) shows a western blot illustrating the effect of Torin on the FGF-2-induced upregulation of HO-1. Both short and long exposed immunoblot images are shown, and demonstrate that Torin abolished the FGF-2 isoform-induced HO-1 upregulation in the presence of Doxorubicin.
